# Supplementary material for: Unveiling the mechanisms behind surface degradation of dental resin composites in simulated oral environments
Source: Royal Society of Chemistry journal article supplement (doi:10.1039/d3tb00756a), 2023-01-01
Supplement: d3tb00756a1.pdf [file d3tb00756a1.pdf]

## **Unveiling the Mechanisms Behind Surface Degradation of Dental Resin Composites in Simulated Oral Environments**

Brenda Ah-yan Leung<sup>a</sup>, William Joe<sup>a</sup>, Sajjad S. Mofarah<sup>\*a</sup>, C.C. Sorrell<sup>a</sup>, Roozbeh Abbasi<sup>a</sup>, Mohsen Azadeh<sup>b</sup>, Joseph A Arsecularatne<sup>a</sup>, and Pramod Koshy<sup>\*a</sup>

<sup>a</sup>School of Materials Science and Engineering, UNSW Sydney, NSW 2052, Australia

<sup>b</sup>School of Materials Science and Engineering, Sharif University of Technology, Tehran, Iran

Corresponding authors' emails: s.seifimofarah@unsw.edu.au, koshy@unsw.edu.au

## Hardness of Composites in Acid and Artificial Saliva Treatment

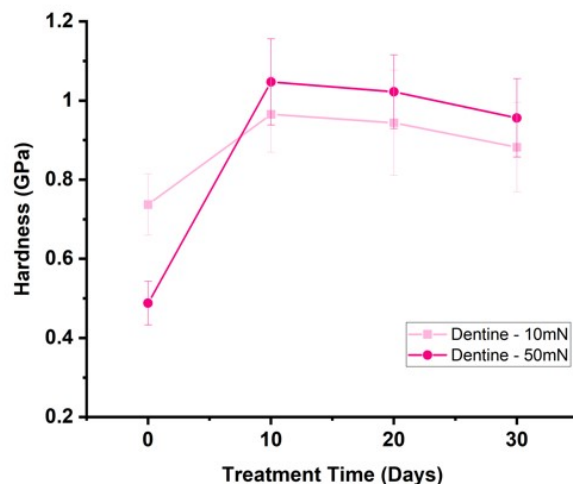

Figure S1. Average hardness values for UC-1 composite after 0, 10, 20, and 30 days of acid treatment.

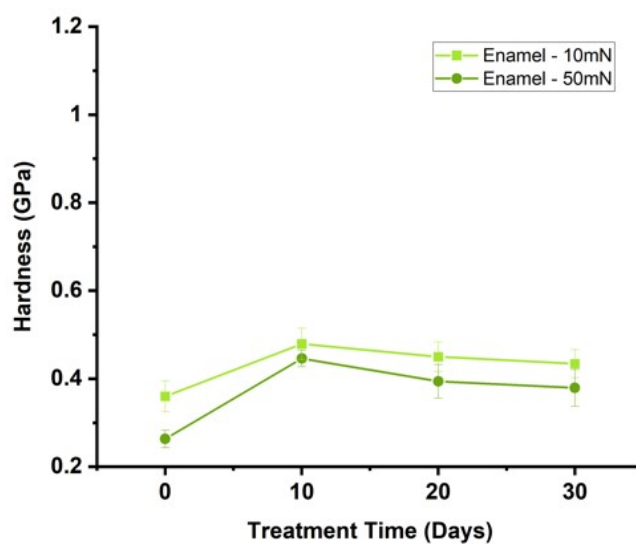

Figure S2. Average hardness values for AC-1 composite after 0, 10, 20 and 30 days of acid treatment.

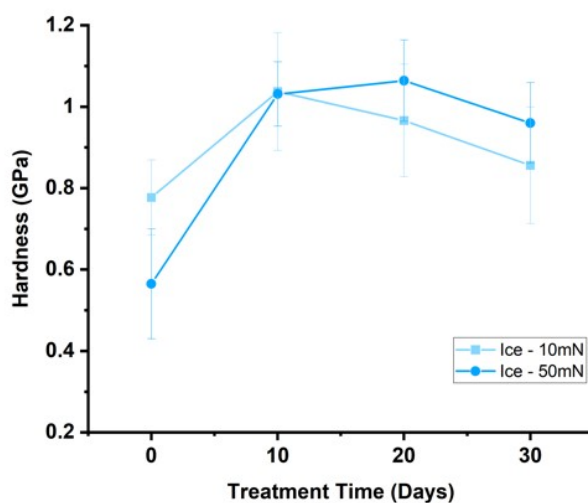

Figure S3. Average hardness values for UC-2 after 0, 10, 20 and 30 days of acid treatment.

## Hardness of Composites in Artificial Saliva Immersion

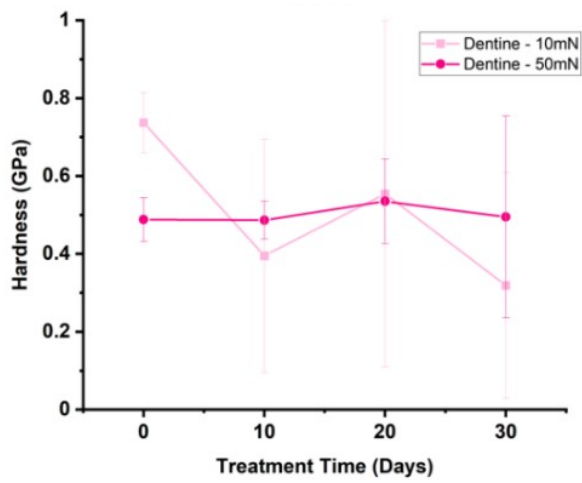

Figure S4. Average hardness for UC-1 after 0, 10, 20 and 30 days of immersion in Artificial saliva.

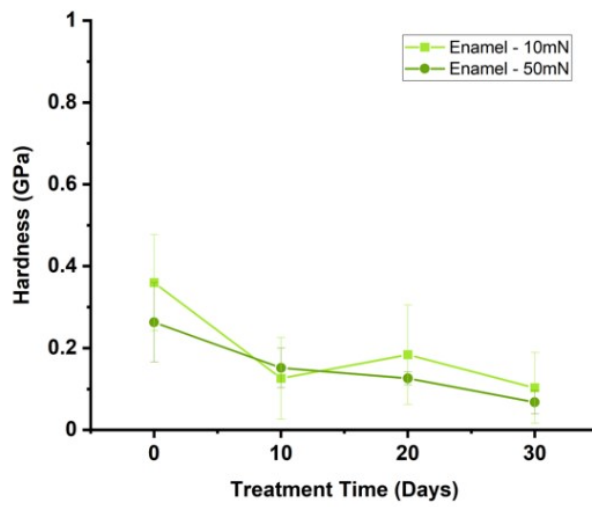

Figure S5. Average hardness for AC-1 after 0, 10, 20 and 30 days of immersion in Artificial saliva.

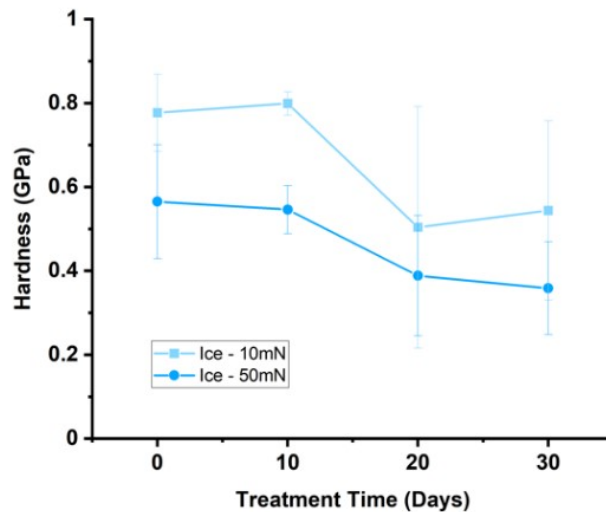

Figure S6. Average hardness for UC-2 after 0, 10, 20 and 30 days of immersion in Artificial saliva.

### Hardness of Composites in Distilled Water Immersion

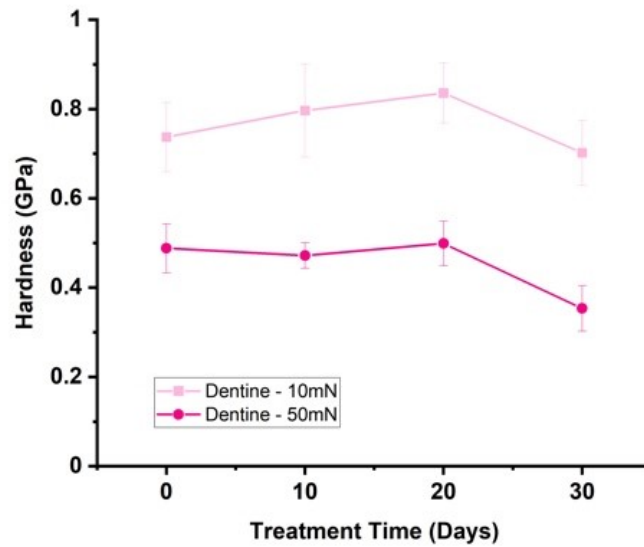

Figure S7. Average hardness for UC-1 after 0, 10, 20 and 30 days of immersion in distilled water.

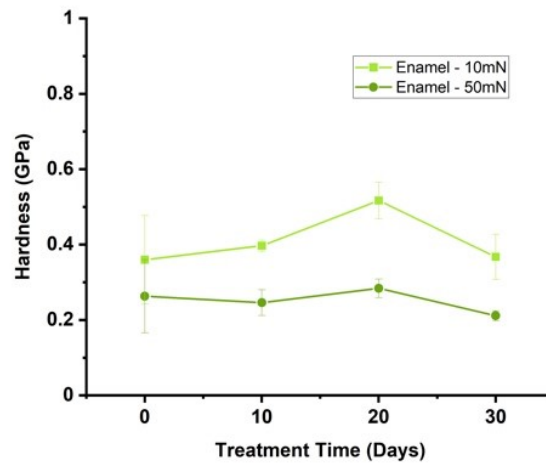

Figure S8. Average hardness for AC-1 after 0, 10, 20 and 30 days of immersion in distilled water.

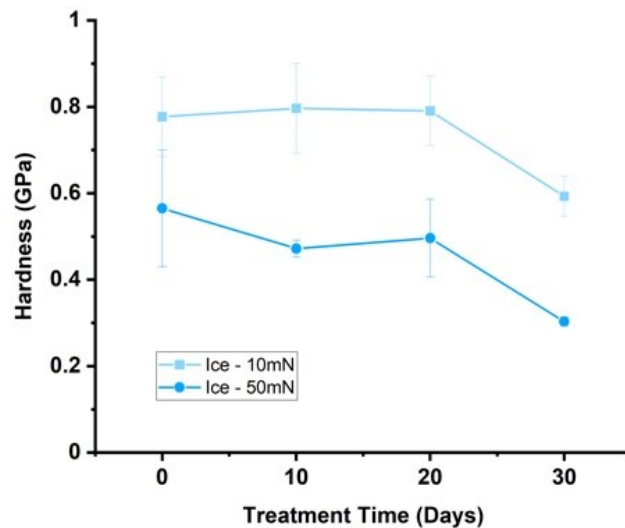

Figure S9. Average hardness for UC-2 after 0, 10, 20 and 30 days of immersion in distilled water.

### Variation in Elements in Leachate

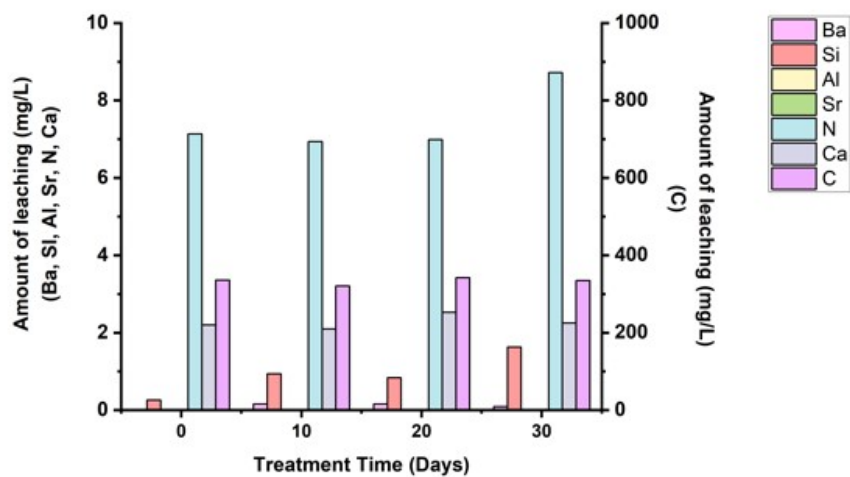

Figures S10. Elements leaching from UC-1 composite after immersion in artificial saliva.

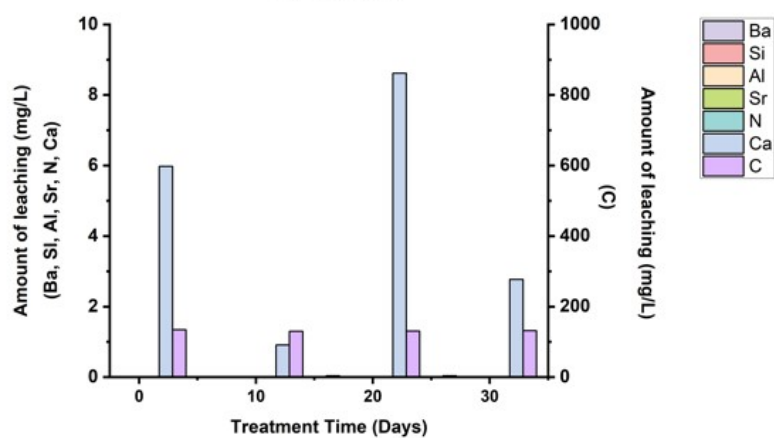

Figures S11. Elements leaching from AC-1 composite after immersion in artificial saliva.

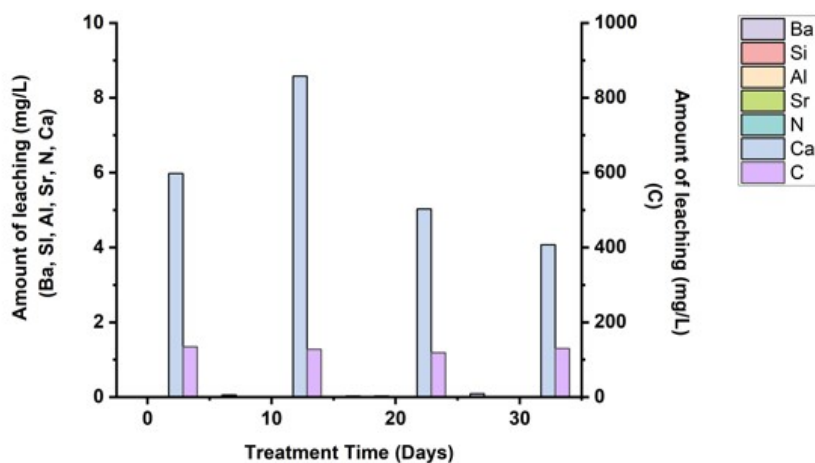

Figures S12. Elements leaching from UC-2 composite after immersion in artificial saliva.

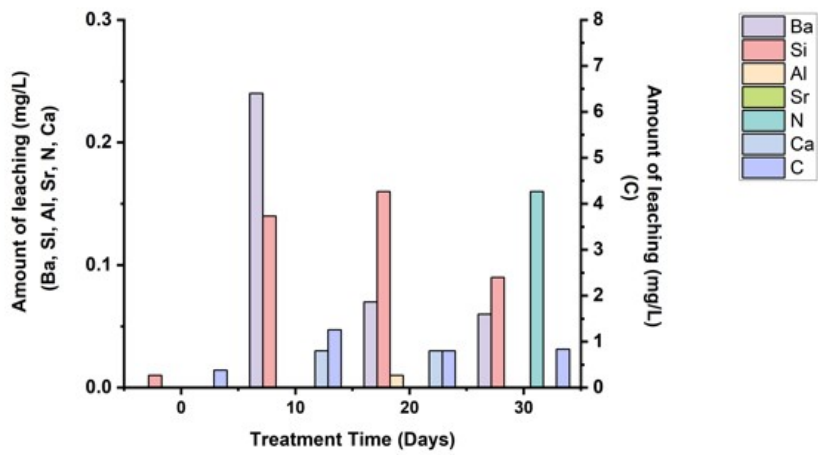

Figures S13. Elements leaching from UC-1 composite after immersion in distilled water.

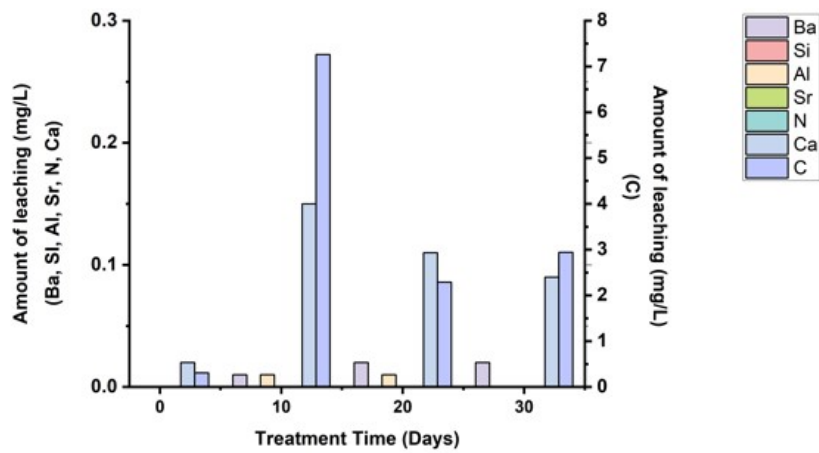

Figures S14. Elements leaching from AC-1 composite after immersion in distilled water.

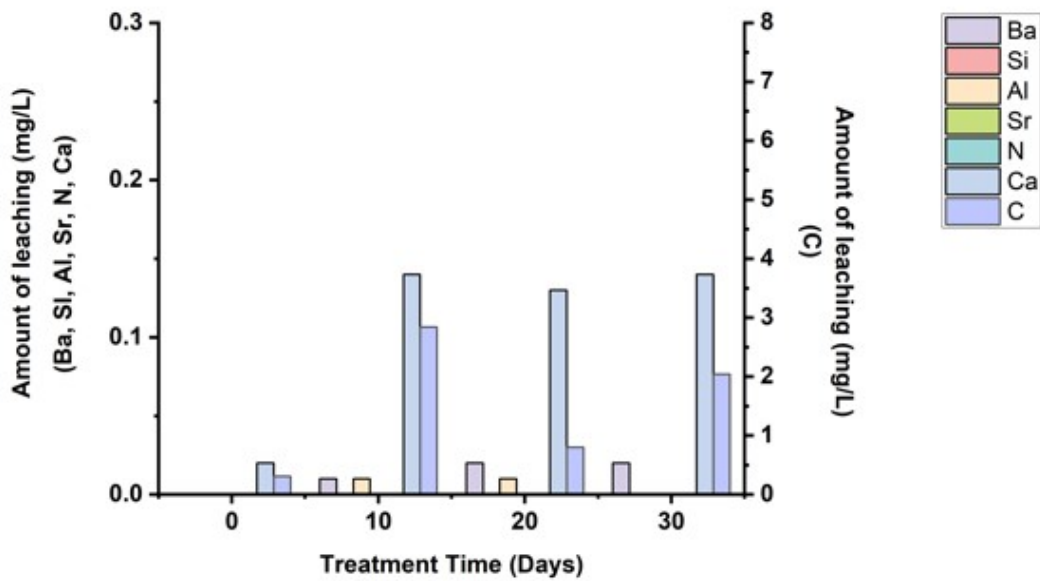

Figures S15. Elements leaching from UC-2 composite after immersion in distilled water.

**Table S1:** ICP results upon the surface of UC-1 across the three treatment conditions at 0, 10, 20 and 30 days.

| Treatment<br>Element | Artificial Saliva |         |         |         | Water  |         |         |         |
|----------------------|-------------------|---------|---------|---------|--------|---------|---------|---------|
|                      | 0 days            | 10 days | 20 days | 30 days | 0 days | 10 days | 20 days | 30 days |
| Al                   | 0.00              | 0.01    | 0.01    | 0.01    | 0.00   | 0.00    | 0.01    | 0.00    |
| Ba                   | 0.02              | 0.16    | 0.16    | 0.09    | 0.00   | 0.24    | 0.07    | 0.06    |
| Ca                   | 5.98              | 1.89    | 7.69    | 3.42    | 0.02   | 0.18    | 0.11    | 0.13    |
| Cu                   | 0.01              | 0.00    | 0.01    | 0.01    | 0.00   | 0.00    | 0.00    | 0.00    |
| K                    | 1101              | 1055    | 1159    | 1101    | 0.11   | 0.52    | 0.18    | 0.35    |
| Mg                   | 0.05              | 0.08    | 0.07    | 0.07    | 0.01   | 0.03    | 0.02    | 0.02    |
| Na                   | 336               | 321     | 342     | 335     | 0.38   | 1.26    | 0.80    | 0.84    |
| P                    | 220               | 210     | 253     | 225     | 0.00   | 0.03    | 0.03    | 0.00    |
| S                    | 15.8              | 17.1    | 16.0    | 16.4    | 0.03   | 0.19    | 0.07    | 0.03    |
| Si                   | 0.26              | 0.94    | 0.84    | 1.63    | 0.01   | 0.14    | 0.16    | 0.09    |
| Sr                   | 0.00              | 0.00    | 0.00    | 0.00    | 0.00   | 0.00    | 0.00    | 0.00    |
| C                    | 135               | 124     | 130     | 128     | 0.31   | 3.29    | 0.40    | 1.42    |
| N                    | 6.67              | 6.68    | 6.79    | 7.09    | 0.04   | 0.15    | 0.02    | 0.14    |
| F                    | 0.00              | 0.00    | 0.00    | 0.00    | 0.00   | 0.00    | 0.00    | 0.00    |
| Cl                   | 714               | 694     | 699     | 872     | 0.00   | 0.00    | 0.00    | 0.16    |

**Table S2.** ICP results upon the surface of AC-2 across the three treatment conditions at 0, 10, 20 and 30 days.

| Treatment<br>Element | Artificial Saliva |         |         |         | Water  |         |         |         |
|----------------------|-------------------|---------|---------|---------|--------|---------|---------|---------|
|                      | 0 days            | 10 days | 20 days | 30 days | 0 days | 10 days | 20 days | 30 days |
| Al                   | 0.00              | 0.01    | 0.02    | 0.00    | 0.00   | 0.01    | 0.01    | 0.00    |
| Ba                   | 0.02              | 0.02    | 0.04    | 0.04    | 0.00   | 0.01    | 0.02    | 0.02    |
| Ca                   | 5.98              | 0.91    | 8.62    | 2.77    | 0.02   | 0.15    | 0.11    | 0.09    |
| Cu                   | 0.01              | 0.00    | 0.02    | 0.00    | 0.00   | 0.00    | 0.00    | 0.00    |
| K                    | 1101              | 1117    | 1148    | 1117    | 0.11   | 1.09    | 0.11    | 0.18    |
| Mg                   | 0.05              | 0.07    | 0.07    | 0.07    | 0.01   | 0.02    | 0.02    | 0.02    |
| Na                   | 336               | 342     | 339     | 340     | 0.38   | 1.21    | 0.88    | 0.85    |
| P                    | 220               | 221     | 242     | 230     | 0.00   | 0.09    | 0.03    | 0.02    |
| S                    | 15.8              | 16.9    | 16.6    | 16.4    | 0.03   | 0.35    | 0.03    | 0.06    |
| Si                   | 0.26              | 1.48    | 1.00    | 2.12    | 0.01   | 0.10    | 0.13    | 0.14    |
| Sr                   | 0.00              | 0.00    | 0.00    | 0.00    | 0.00   | 0.00    | 0.00    | 0.00    |
| C                    | 135               | 130     | 131     | 132     | 0.31   | 7.26    | 2.29    | 2.94    |
| N                    | 6.67              | 6.89    | 6.60    | 7.37    | 0.04   | 0.19    | 0.11    | 0.12    |
| F                    | 0.00              | 0.00    | 0.00    | 0.00    | 0.00   | 0.00    | 0.00    | 0.00    |
| Cl                   | 714               | 694     | 706     | 874     | 0.00   | 0.00    | 0.00    | 0.07    |

**Table S3.** ICP results upon the surface of IC-2 across the three treatment conditions at 0, 10, 20 and 30 days.

| Treatment | Artificial Saliva |        |         |         | Water   |        |         |         |
|-----------|-------------------|--------|---------|---------|---------|--------|---------|---------|
|           | Element           | 0 days | 10 days | 20 days | 30 days | 0 days | 10 days | 20 days |
| Al        | 0.00              | 0.00   | 0.03    | 0.01    | 0.00    | 0.01   | 0.01    | 0.00    |
| Ba        | 0.02              | 0.06   | 0.03    | 0.09    | 0.00    | 0.01   | 0.02    | 0.02    |
| Ca        | 5.98              | 8.58   | 5.03    | 4.07    | 0.02    | 0.14   | 0.13    | 0.14    |
| Cu        | 0.01              | 0.01   | 0.01    | 0.01    | 0.00    | 0.00   | 0.00    | 0.00    |
| K         | 1101              | 1086   | 1124    | 1108    | 0.11    | 0.65   | 0.19    | 0.27    |
| Mg        | 0.05              | 0.10   | 0.07    | 0.11    | 0.01    | 0.02   | 0.02    | 0.02    |
| Na        | 336               | 332    | 331     | 337     | 0.38    | 1.33   | 0.80    | 0.83    |
| P         | 220               | 219    | 249     | 231     | 0.00    | 0.08   | 0.05    | 0.01    |
| S         | 15.8              | 17.4   | 16.4    | 15.9    | 0.03    | 0.25   | 0.04    | 0.01    |
| Si        | 0.26              | 0.53   | 1.10    | 2.07    | 0.01    | 0.13   | 0.08    | 0.08    |
| Sr        | 0.00              | 0.09   | 0.02    | 0.02    | 0.00    | 0.05   | 0.02    | 0.02    |
| C         | 135               | 128    | 119     | 130     | 0.31    | 2.84   | 0.80    | 2.04    |
| N         | 6.67              | 6.61   | 6.67    | 7.07    | 0.04    | 0.14   | 0.07    | 0.12    |
| F         | 0.00              | 0.00   | 0.00    | 0.00    | 0.00    | 0.00   | 0.00    | 0.00    |
| Cl        | 714               | 691    | 702     | 866     | 0.00    | 0.00   | 0.00    | 0.09    |

### Surface Chemistry Changes

**Table S4.** XPS results upon the surface of UC-1 across the three treatment conditions at 0, 10 and 30 days.

| Treatment | Control | Hydrochloric Acid |         | Artificial Saliva |         | Distilled Water |         |
|-----------|---------|-------------------|---------|-------------------|---------|-----------------|---------|
|           | 0 days  | 10 days           | 30 days | 10 days           | 30 days | 10 days         | 30 days |
| Ba        | 1.863   | 0.496             | 0.281   | 0.811             | 0.688   | 1.104           | 0.844   |
| Si        | 17.91   | 16.19             | 6.60    | 10.25             | 11.81   | 17.36           | 18.24   |
| Al        | 2.609   | 1.227             | 0.000   | 1.592             | 1.862   | 2.082           | 2.344   |
| Sr        |         |                   |         |                   | 0.000   |                 | 0.000   |
| O         | 75.05   | 72.26             | 76.90   | 79.55             | 71.97   | 73.93           | 72.49   |
| K         |         |                   |         | 0.811             | 0.000   |                 | 0.000   |
| Na        | 0.000   |                   | 0.597   | 0.250             | 0.805   |                 | 0.000   |
| N         | 1.260   | 6.686             | 11.267  | 2.871             | 4.478   | 1.738           | 2.663   |
| Ca        | 0.745   | 0.783             | 3.580   | 6.538             | 4.898   | 0.344           | 0.563   |
| P         | 0.000   |                   | 0.772   | 3.433             | 3.489   | 0.000           | 0.000   |

**Table S5:** XPS results upon the surface of AC-1 across the three treatment conditions at 0, 10 and 30 days.

| Treatment | Control | Acid Treatment |         | Artificial Saliva |         | Distilled Water |         |
|-----------|---------|----------------|---------|-------------------|---------|-----------------|---------|
|           | 0 days  | 10 days        | 30 days | 10 days           | 30 days | 10 days         | 30 days |



|           |       |       |       |        |       |       |       |
|-----------|-------|-------|-------|--------|-------|-------|-------|
| <b>Ba</b> |       |       |       |        | 0.000 | 0.148 | 0.000 |
| <b>Si</b> | 18.75 | 9.66  | 4.40  | 5.76   | 5.15  | 16.29 | 19.05 |
| <b>Al</b> | 0.000 | 0.453 |       |        | 0.000 | 2.366 | 0.000 |
| <b>Sr</b> |       |       |       |        | 0.000 | 0.549 | 0.000 |
| <b>O</b>  | 76.59 | 78.26 | 78.66 | 73.01  | 70.46 | 75.31 | 77.69 |
| <b>K</b>  |       |       |       |        | 0.000 |       | 0.000 |
| <b>Na</b> |       |       | 0.975 |        | 0.739 |       | 0.000 |
| <b>N</b>  | 2.013 | 6.943 | 8.717 | 3.513  | 9.748 | 1.943 | 3.262 |
| <b>Ca</b> | 0.905 | 2.868 | 3.694 | 11.475 | 8.290 | 1.542 | 0.000 |
| <b>Cl</b> |       |       | 0.768 |        | 0.000 |       | 0.000 |
| <b>P</b>  |       |       | 1.891 | 6.233  | 5.613 |       | 0.000 |

**Table S6.** XPS results upon the surface of UC-2 across the three treatment conditions at 0, 10 and 30 days.

| <b>Treatment</b> | <b>Control</b> | <b>Acid Treatment</b> |         | <b>Artificial Saliva</b> |         | <b>Distilled Water</b> |         |
|------------------|----------------|-----------------------|---------|--------------------------|---------|------------------------|---------|
| <b>Element</b>   | 0 days         | 10 days               | 30 days | 10 days                  | 30 days | 10 days                | 30 days |
| <b>Ba</b>        |                |                       |         |                          | 0.101   |                        | 0.000   |
| <b>Si</b>        | 18.00          | 14.34                 | 4.45    | 14.45                    | 6.70    | 17.78                  | 17.85   |
| <b>Al</b>        | 3.943          | 1.084                 | 0.000   | 2.864                    | 1.536   |                        | 2.493   |
| <b>Sr</b>        | 1.840          |                       | 0.067   | 0.761                    | 0.362   |                        | 0.401   |
| <b>O</b>         | 90.71          | 74.05                 | 75.68   | 71.80                    | 69.07   | 79.04                  | 74.67   |
| <b>K</b>         |                |                       |         | 1.287                    | 0.000   |                        | 0.000   |
| <b>Na</b>        | 0.000          |                       | 0.334   |                          | 0.377   |                        | 0.190   |
| <b>N</b>         | 1.950          | 8.101                 | 5.901   | 3.752                    | 4.348   | 2.854                  | 3.485   |
| <b>Ca</b>        | 0.811          | 0.387                 | 7.793   | 1.214                    | 10.668  | 0.327                  | 0.908   |
| <b>Cl</b>        |                | 0.310                 |         |                          | 0.000   |                        | 0.000   |
| <b>P</b>         | 0.000          |                       | 4.453   | 0.236                    | 6.842   |                        | 0.000   |

### Nano-mechanical properties

**Table S7.** Average hardness values of hydrochloric acid-treated dental composites over 0, 10, 20 and 30 days.

| Dental Composite | Treatment Time (Days) |          |       |          |       |          |       |          |
|------------------|-----------------------|----------|-------|----------|-------|----------|-------|----------|
|                  | 0                     | $\sigma$ | 10    | $\sigma$ | 20    | $\sigma$ | 30    | $\sigma$ |
| UC-1 (10 mN)     | 0.737                 | 0.078    | 0.965 | 0.096    | 0.944 | 0.133    | 0.882 | 0.114    |
| UC-1 (50 mN)     | 0.488                 | 0.592    | 1.047 | 0.109    | 1.022 | 0.094    | 0.956 | 0.099    |
| AC-1 (10 mN)     | 0.360                 | 0.036    | 0.479 | 0.036    | 0.450 | 0.034    | 0.434 | 0.032    |
| AC-1 (50 mN)     | 0.263                 | 0.020    | 0.446 | 0.020    | 0.394 | 0.039    | 0.379 | 0.042    |
| UC-2 (10 mN)     | 0.777                 | 0.092    | 1.037 | 0.146    | 0.966 | 0.138    | 0.856 | 0.144    |
| UC-2 (50 mN)     | 0.565                 | 0.136    | 1.031 | 0.080    | 1.064 | 0.108    | 0.960 | 0.099    |

**Table S8.** Average hardness values of dental composites immersed in Artificial saliva over 0, 10, 20 and 30 days.

| Dental Composite | Treatment Time (Days) |          |       |          |       |          |       |          |
|------------------|-----------------------|----------|-------|----------|-------|----------|-------|----------|
|                  | 0                     | $\sigma$ | 10    | $\sigma$ | 20    | $\sigma$ | 30    | $\sigma$ |
| UC-1 (10 mN)     | 0.737                 | 0.078    | 0.395 | 0.300    | 0.554 | 0.445    | 0.319 | 0.398    |
| UC-1 (50 mN)     | 0.488                 | 0.056    | 0.487 | 0.487    | 0.535 | 0.109    | 0.495 | 0.259    |
| AC-1 (10 mN)     | 0.360                 | 0.118    | 0.127 | 0.117    | 0.184 | 0.121    | 0.103 | 0.086    |
| AC-1 (50 mN)     | 0.263                 | 0.097    | 0.151 | 0.048    | 0.126 | 0.016    | 0.068 | 0.029    |
| UC-2 (10 mN)     | 0.777                 | 0.092    | 0.799 | 0.029    | 0.504 | 0.362    | 0.545 | 0.214    |
| UC-2 (50 mN)     | 0.565                 | 0.136    | 0.547 | 0.057    | 0.389 | 0.143    | 0.359 | 0.111    |

**Table S9.** Average hardness values of dental composites immersed in Artificial saliva over 0, 10, 20 and 30 days.

| Dental Composites | Treatment Time (Days) |          |       |          |       |          |       |          |
|-------------------|-----------------------|----------|-------|----------|-------|----------|-------|----------|
|                   | 0                     | $\sigma$ | 10    | $\sigma$ | 20    | $\sigma$ | 30    | $\sigma$ |
| UC-1 (10 mN)      | 0.737                 | 0.078    | 0.797 | 0.104    | 0.836 | 0.067    | 0.702 | 0.073    |
| UC-1 (50 mN)      | 0.488                 | 0.056    | 0.472 | 0.029    | 0.500 | 0.051    | 0.353 | 0.051    |
| AC-1 (10 mN)      | 0.360                 | 0.118    | 0.398 | 0.015    | 0.517 | 0.049    | 0.368 | 0.069    |
| AC-1 (50 mN)      | 0.263                 | 0.097    | 0.246 | 0.034    | 0.285 | 0.024    | 0.211 | 0.014    |
| UC-2 (10 mN)      | 0.777                 | 0.092    | 0.797 | 0.104    | 0.790 | 0.080    | 0.593 | 0.047    |
| UC-2 (50 mN)      | 0.565                 | 0.136    | 0.472 | 0.029    | 0.496 | 0.090    | 0.303 | 0.011    |
